# Supplementary material for: A self-adapting first-principles exploration on the dissociation mechanism in sodiated aldohexose pyranoses assisted with neural network potentials
Source: Royal Society of Chemistry journal article supplement (doi:10.1039/d2cp04421h), 2022-12-12

**Electronic Supplementary Information**  
**For**  
**A self-adapting first-principles exploration on the dissociation**  
**mechanism in sodiated aldohexose pyranoses assisted with neural**  
**network potentials**

Pei-Kang Tsou,<sup>a</sup> Hai Thi Huynh,<sup>a,b,c</sup> Huu Trong Phan,<sup>a,b,c</sup> and Jer-Lai Kuo,<sup>a,b,c,d</sup>

- a. Institute of Atomic and Molecular Sciences, Academia Sinica, Taipei, 10617, Taiwan
- b. Molecular Science and Technology Program, Taiwan International Graduate Program, Academia Sinica, Taipei, 11529, Taiwan
- c. Department of Chemistry, National Tsing Hua University, Hsinchu 30013, Taiwan.
- d. International Graduate Program of Molecular Science and Technology (NTU-MST), National Taiwan University, Taipei 10617, Taiwan

**Figure S1.** Mean absolute error (MAE) of energy (in kJ/mol) and force (in kJ/mol/Å) obtained during training. The learning rate is controlled by the Reduce LR On Plateau hook and is reduced during training.

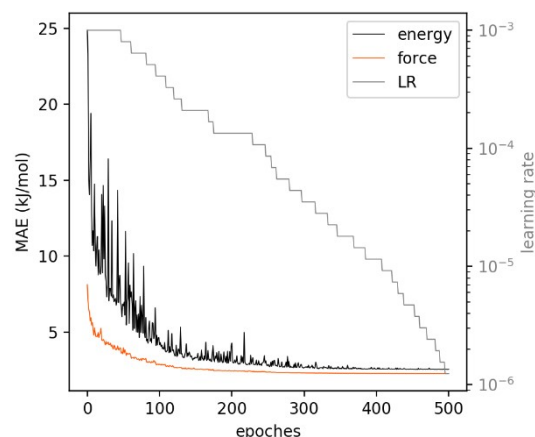

**Figure S2. (a)** Structure modifications for generating the initial guess in protocol-2. The minima conformers with the  $\text{Na}^+$  binding to the proton donor were chosen as the candidates. The hydroxyl group of the proton donor was labeled as  $\text{O}_\text{D}\text{H}_\text{D}$ , while that of the proton acceptor was  $\text{O}_\text{A}\text{H}_\text{A}$ . The C atom attached to  $\text{O}_\text{A}$  and  $\text{O}_\text{D}$  was labeled as  $\text{C}_\text{A}$  and  $\text{C}_\text{D}$ , respectively. For the dehydration, the initial guess is generated with the bond length of  $\text{C}_\text{A}-\text{O}_\text{A}$  elongated to  $2.1\text{\AA}$ , and the distance of  $\text{O}_\text{A}-\text{H}_\text{D}$  shortened to  $1.1\text{\AA}$ . **(b)** The Structure modifications in protocol-2.2 (for QST3 calculation). The Structure-3 is the same as that used in protocol-2. The Structure-1 and Structure-2 are generated according to the direction of the normal mode of the  $\text{C}_\text{A}-\text{O}_\text{A}$  and  $\text{O}_\text{A}-\text{H}_\text{D}$  as shown in the figures.

**(a)**

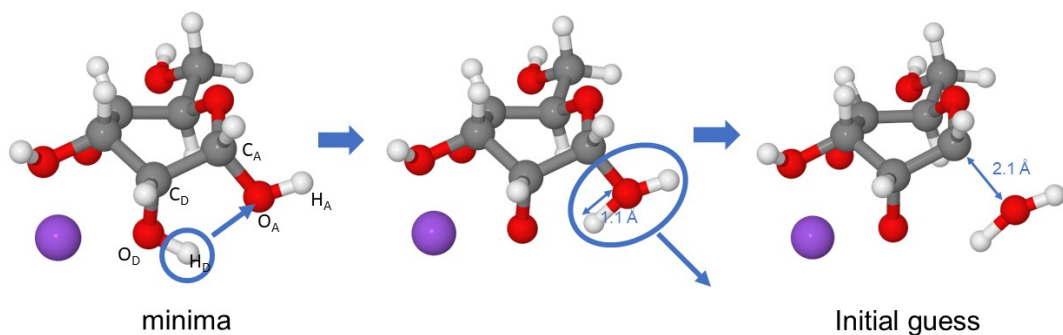

**(b)**

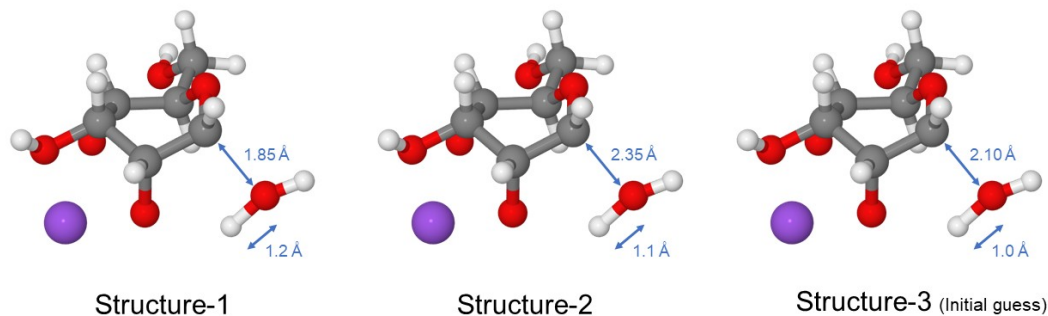

**Figure S3.** Performance of best NNP model trained on the DFT datapoints in AH-0. Relative energy predictions of NNP-0(y-axis) vs. B3LYP(x-axis) of the (a) Validation set and (b) Test set. The histogram of the actual value and the predicted value is shown in grey on the x-axis and y-axis. Data points along the reaction path leading to dehydration and ring-opening are shown in blue and green, respectively.

**(a) Energy:**

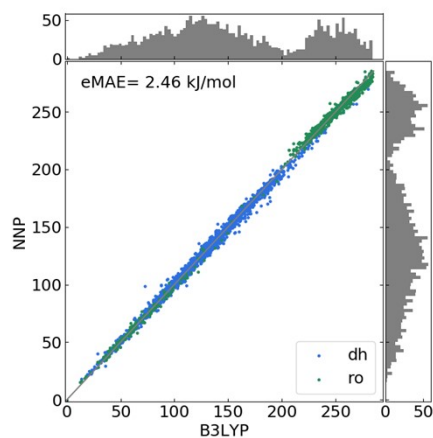

**Gradient:**

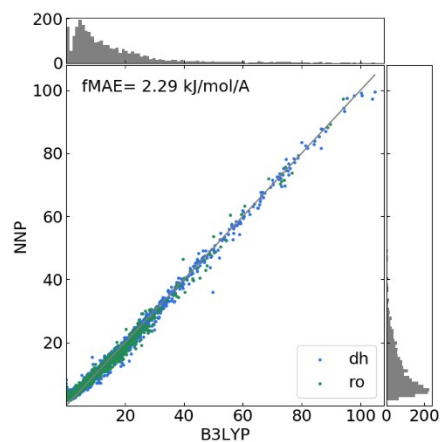

**(b) energy**

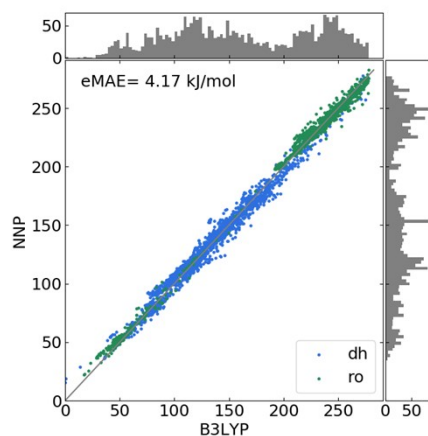

**gradient**

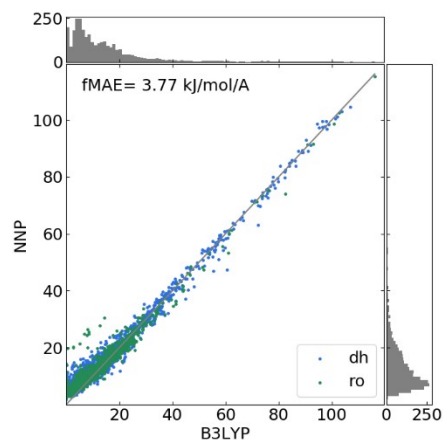

**Figure S4.** The plot for the 30 lowest energy TS-dh and TS-ro of AH-0 and AH-1. The TSs located by protocol-1, protocol-2, and protocol-3 are labeled with different notations. The energy histograms of all the TS-dh and TS-ro are shown in the subfigures.

AH-0:

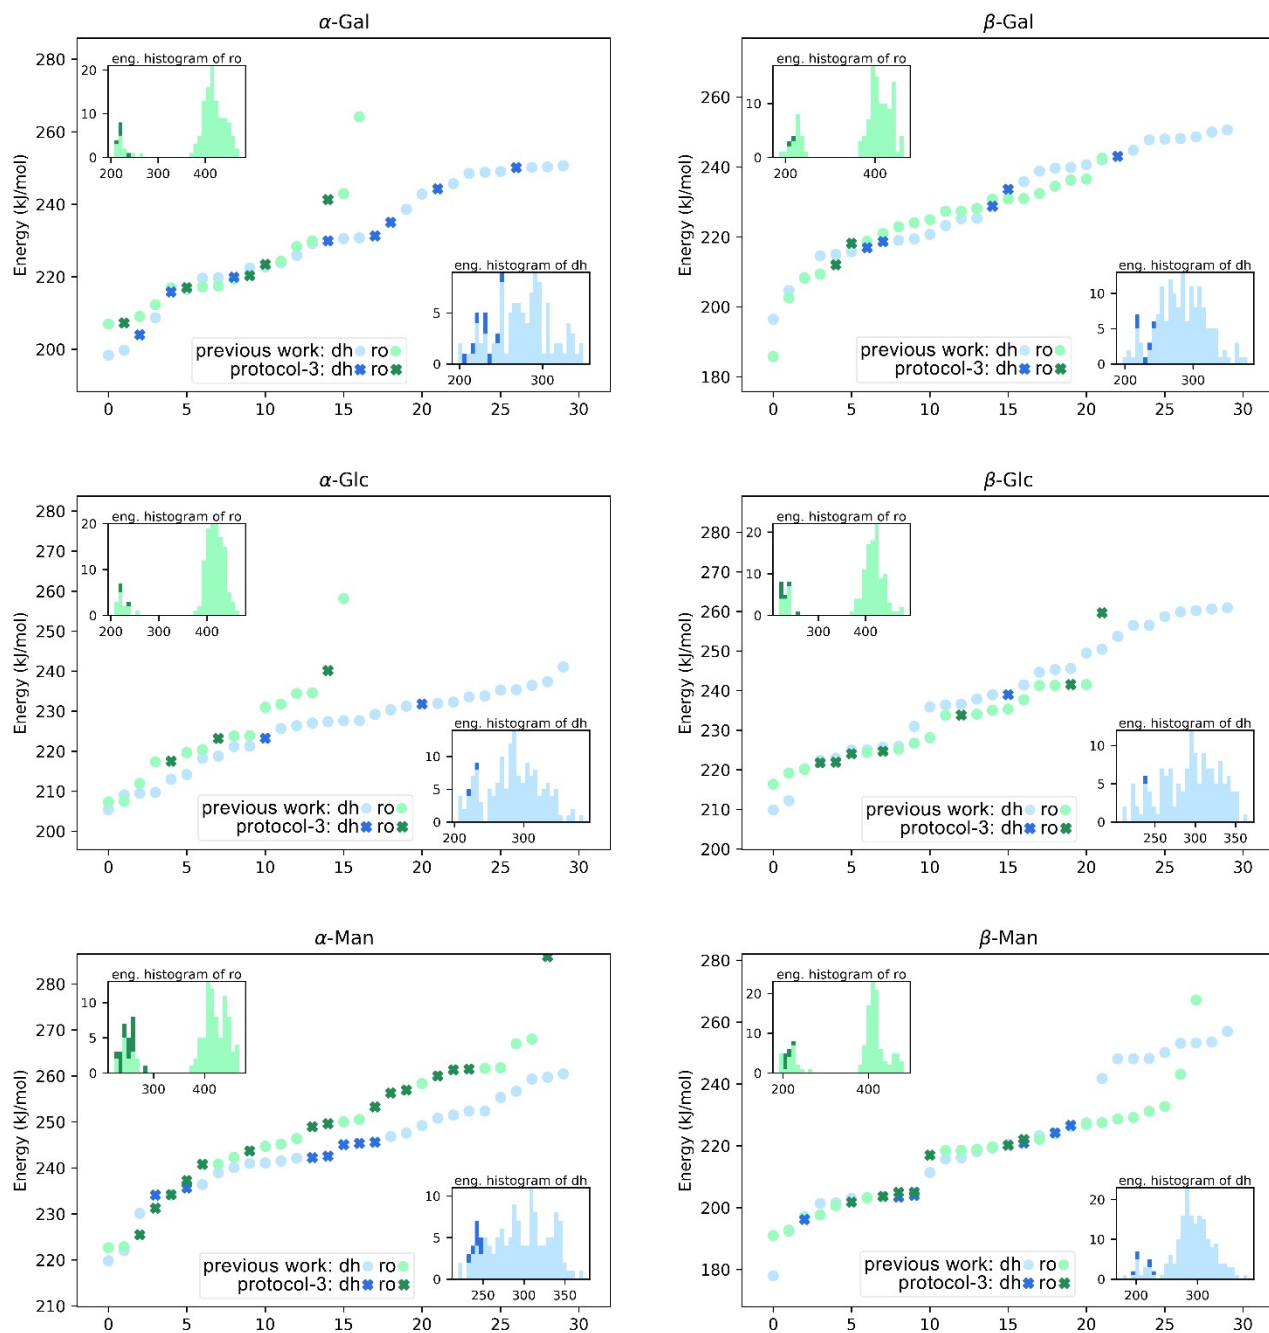

AH-1:

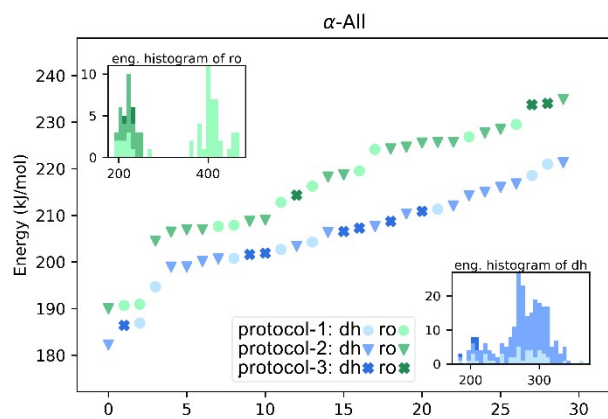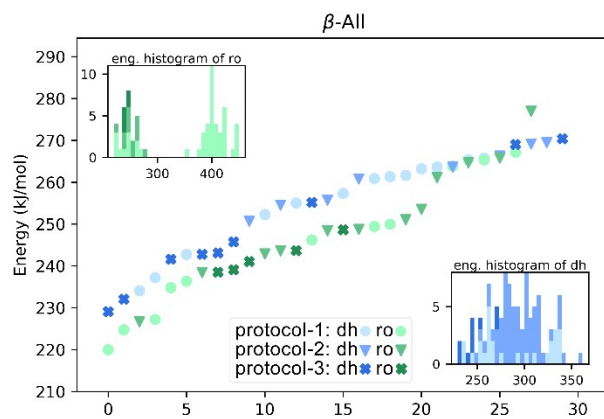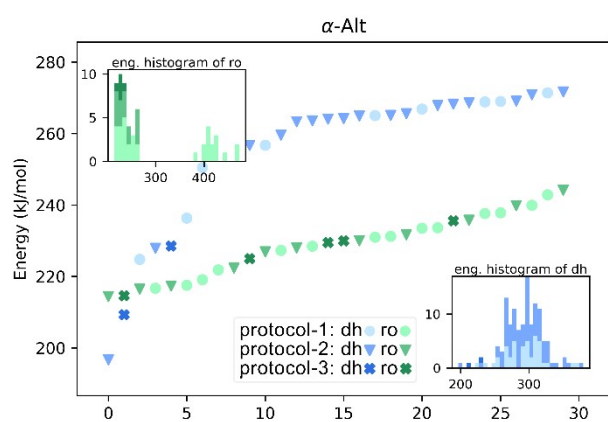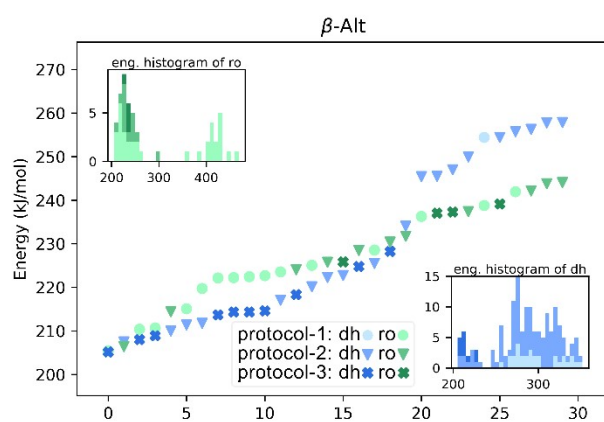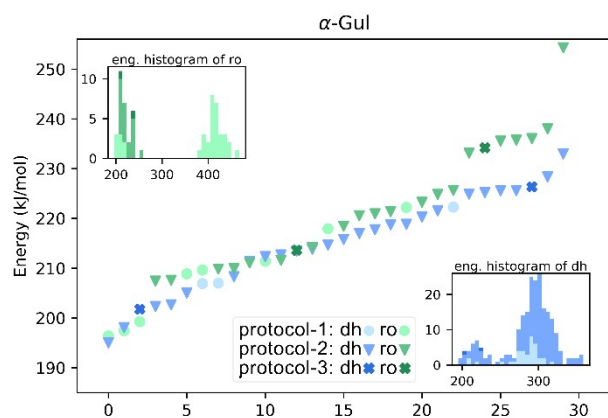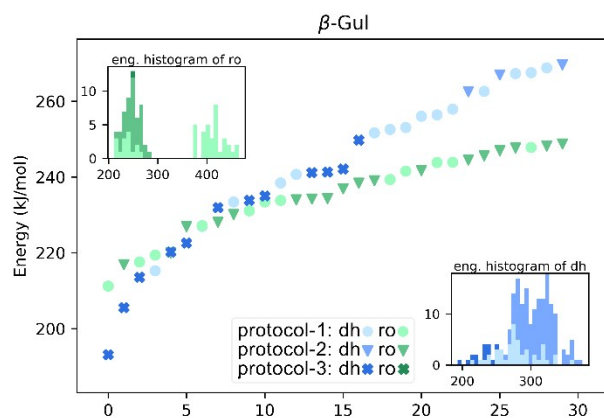

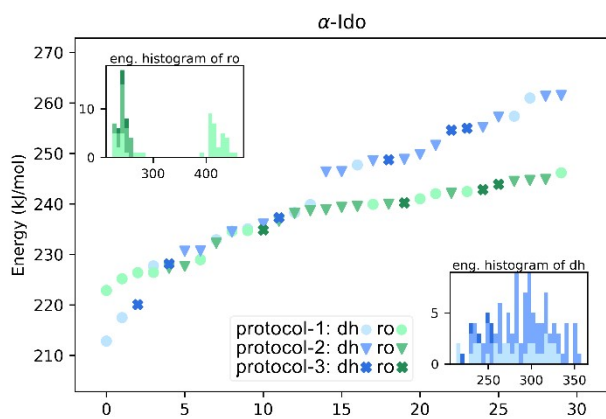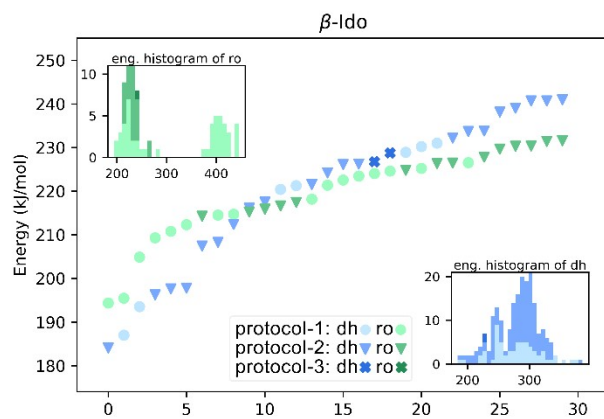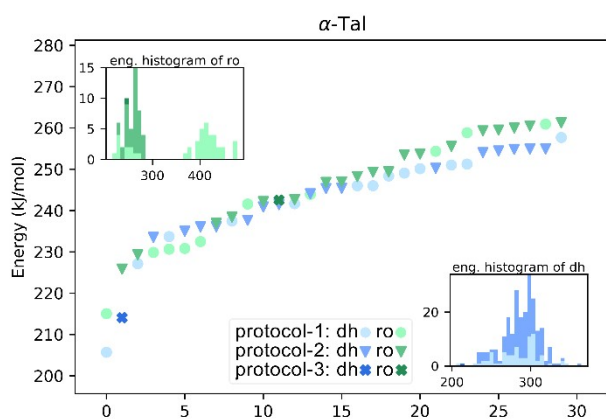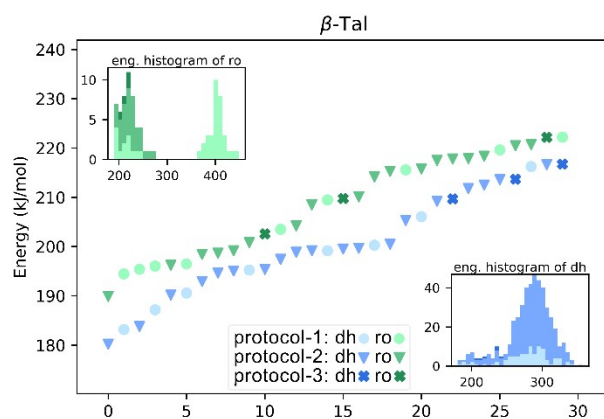

Supplement: d2cp04421h1.pdf [file d2cp04421h1.pdf]
